# Supplementary material for: Bimetallic copper- and nickel-rich Cu–Ni phyllosilicate catalysts for the liquid phase selective hydrogenation of furfural to furfuryl alcohol
Source: Royal Society of Chemistry journal article supplement (doi:10.1039/d4ra07162j), 2024-01-01
Supplement: d4ra07162j1.pdf [file d4ra07162j1.pdf]

**Bimetallic Copper- and Nickel-Rich Cu-Ni Phyllosilicate Catalysts for the Liquid-Phase  
Selective Hydrogenation of Furfural to Furfuryl Alcohol**

Tanyarat Shoosri <sup>a</sup>, Pisacha Chotiwilaiwan <sup>a</sup>, Tanisorn Rattanapornchaiwat <sup>a</sup>, Thapong  
Teerawatananon <sup>b,c</sup>, Takanori Miyake <sup>d</sup>, Joongjai Panpranot <sup>e</sup>, Patcharaporn Weerachawanasak <sup>a,c\*</sup>

<sup>a</sup> *Department of Chemistry, School of Science, King Mongkut's Institute of Technology Ladkrabang,  
Bangkok, 10520 Thailand*

<sup>b</sup> *College of Innovation and Industrial Management, King Mongkut's Institute of Technology Ladkrabang,  
Bangkok, 10520 Thailand*

<sup>c</sup> *Advanced Pure and Applied Chemistry Research Unit, School of Science, King Mongkut's Institute of  
Technology Ladkrabang, Bangkok, 10520 Thailand*

<sup>d</sup> *Graduate School of Science and Engineering, Environmental and Urban Major,  
Kansai University, 3-3-35 Yamate, Suita, Osaka, 564-8680 Japan*

<sup>e</sup> *Center of Excellence on Catalysis and Catalytic Reaction Engineering, Department of Chemical  
Engineering, Faculty of Engineering, Chulalongkorn University, Bangkok, 10330 Thailand*

## Supporting Information

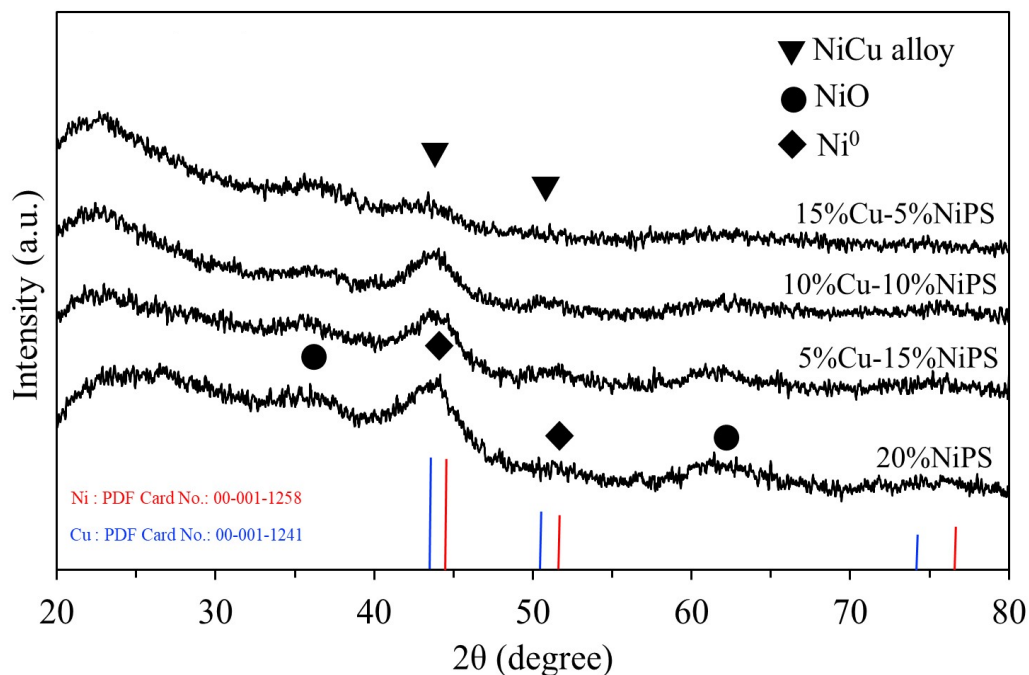

**Fig. S1** XRD patterns of monometallic 20%NiPS and bimetallic Cu-NiPS catalysts reduced at 600 °C compared to the PDF card of metallic Ni<sup>0</sup> and Cu<sup>0</sup>.

**Fig. S1** exhibits XRD patterns of monometallic 20%NiPS and bimetallic Cu-NiPS catalysts reduced at 600 °C compared to the PDF card of metallic Ni<sup>0</sup> and Cu<sup>0</sup>. Since the metal phyllosilicate structure consisted of the octahedral layer of metal and tetrahedral layer of SiO<sub>2</sub>, the low crystallinity with small crystallite size of metal ( $d_p < 5.0$  nm) effect to broad diffraction peaks of XRD. However, the XRD patterns of all reduced catalysts were corresponding well with PDF cards of metallic Ni<sup>0</sup> and metallic Cu<sup>0</sup>.

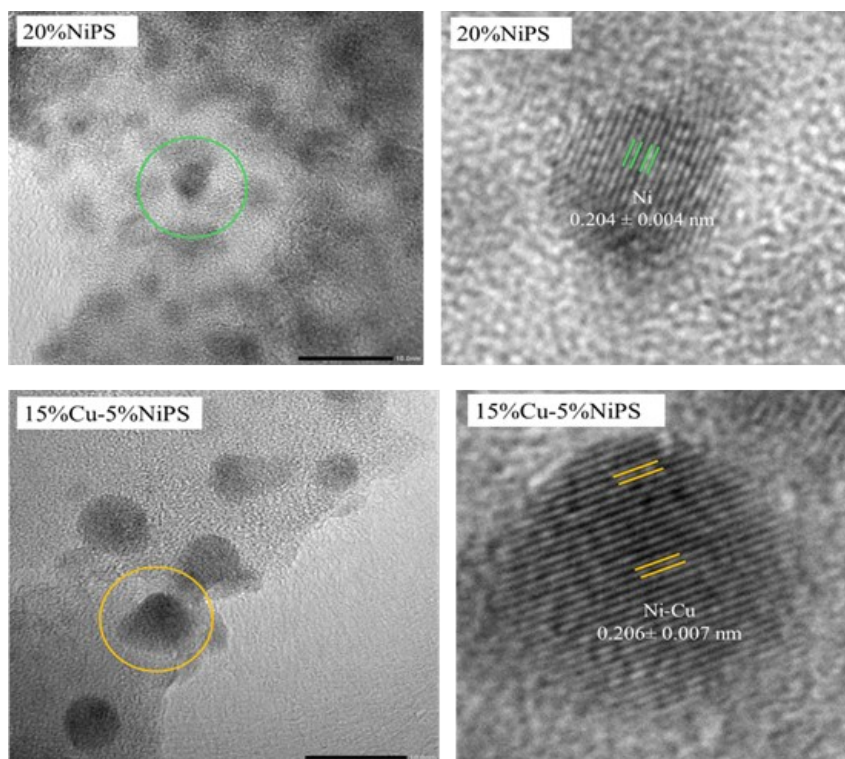

**Fig. S2** HR-TEM of monometallic 20%NiPS and bimetallic 15%Cu-5%NiPS catalysts

To clarify the lattice patterns of Ni and Cu metals, the lattice patterns in two types of catalysts: a monometallic 20% NiPS catalyst and a bimetallic 15%Cu-5%NiPS catalyst were determined by High-Resolution Transmission Electron Microscopy (HR-TEM) with the results illustrated in **Fig. S2**. The lattice spacing (d-spacing) of both samples were measured around 30 points for each sample. The d-spacing for Ni in the monometallic 20% NiPS catalyst was found to be  $0.204 \pm 0.004$  nm, which aligns closely with the expected value noted in the PDF file (Ni-PDF: 00-004-0850). Furthermore, for the bimetallic 15%Cu-5%NiPS catalyst, the lattice spacing for the NiCu alloy was measured at  $0.206 \pm 0.007$  nm. This value shows a slight shift from the expected d-spacing for pure Ni (PDF: 00-004-0850) and Cu (PDF: 00-004-0836). These results confirm the formation of a NiCu alloy in the bimetallic catalyst, highlighting the interactions between Ni and Cu at the atomic level.

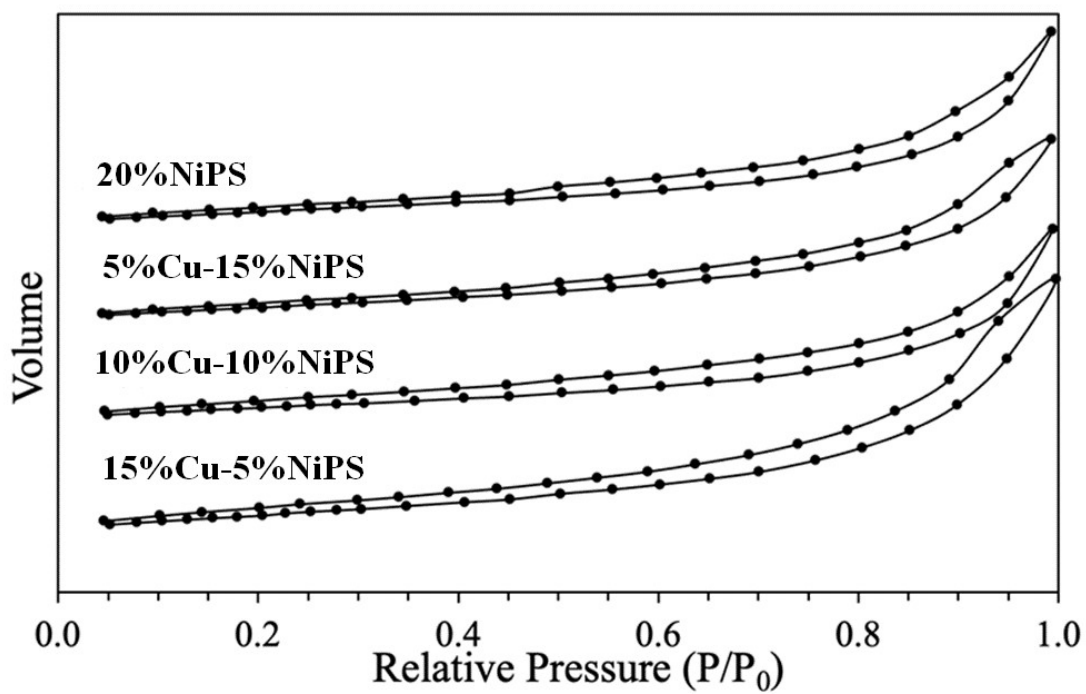

**Fig. S3** N<sub>2</sub> adsorption-desorption isotherms of monometallic 20%NiPS and bimetallic Cu-NiPS catalysts

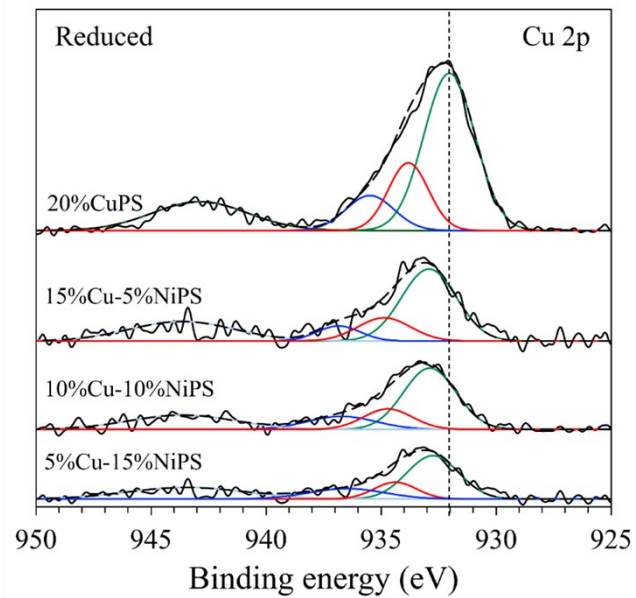

**Fig. S4** XPS spectra of Cu 2p for reduced bimetallic Cu-NiPS catalysts compared with monometallic 20%CuPS catalyst (did not use in this study).

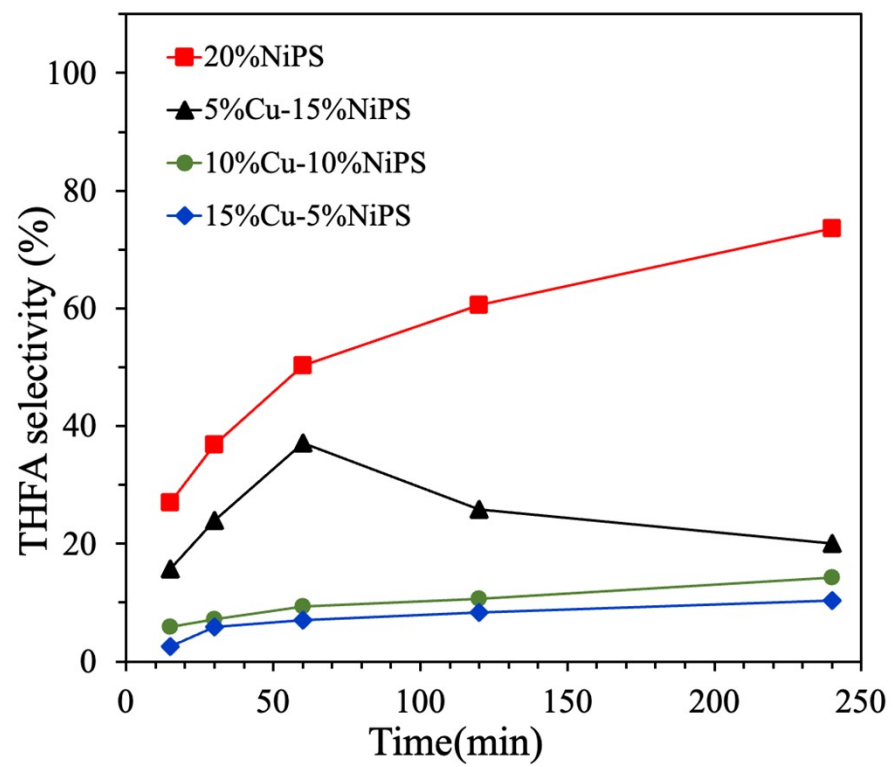

Fig. S5 The selectivity to THFA for all catalysts

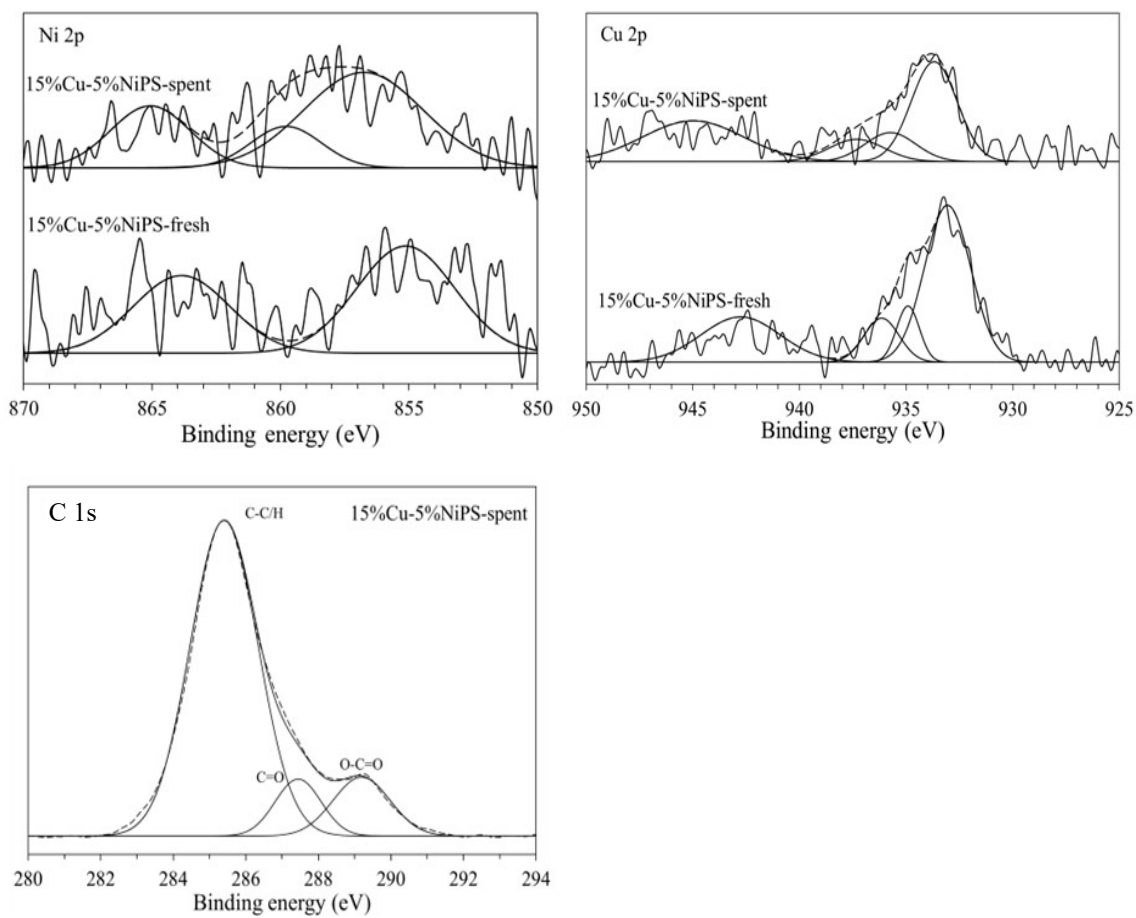

**Fig. S6** XPS spectra of Ni 2p, Cu 2p, and C 1s of fresh and spent 15%Cu-5%NiPS catalysts

**Table S1** Surface compositions of fresh and spent of 15%Cu-5%NiPS catalysts

| <b>Catalysts</b>   | <b>B.E. (eV)</b> |              | <b>% Atomic Concentration</b> |              |             |                   |
|--------------------|------------------|--------------|-------------------------------|--------------|-------------|-------------------|
|                    | <b>Ni 2p</b>     | <b>Cu 2p</b> | <b>Cu/Si</b>                  | <b>Ni/Si</b> | <b>C/Si</b> | <b>(Cu+Ni)/Si</b> |
| 15%Cu-5%NiPS-fresh | 855.1            | 933.1        | 0.22                          | 0.02         | -           | 0.24              |
| 15%Cu-5%NiPS-spent | 856.7            | 933.8        | 0.16                          | 0.05         | 0.53        | 0.21              |

Note: The Ag 3d at B.E. 368.2 eV is used as a standard to determine carbon on the surface
